# Supplementary material for: Understanding the Interaction of Thermal, Rheological, and Mechanical Parameters Critical for the Processability of Polyvinyl Alcohol-Based Systems during Hot Melt Extrusion
Source: MDPI journal article supplement (doi:10.3390/pharmaceutics16040472), 2024-03-28
Supplement: s1 [file s1]

## Supplementary data

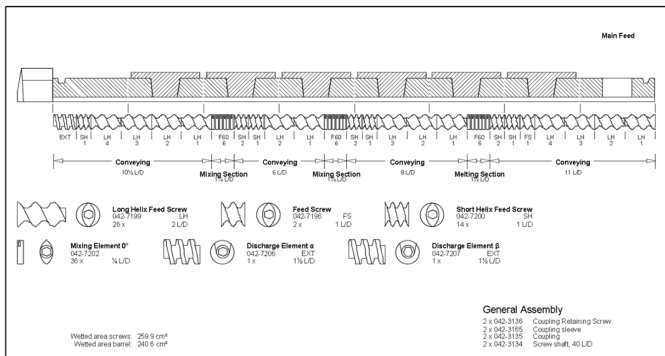

**Figure S1. Screw configuration. Image created with the ScrewConfig software (Version 1.42(2) Thermo Fisher Scientific Inc., Waltham, MA, USA).**

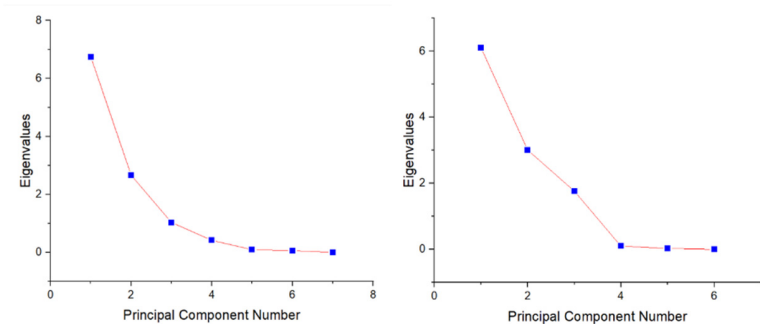

**Figure S2. Scree-diagram (left): PVA 3-82, (right): PVA 4-88.**
